# Supplementary material
Source: PubMed Central journal article supplement (PMC1589992)
Supplement: 7601329s1.pdf [file 7601329s1.pdf]

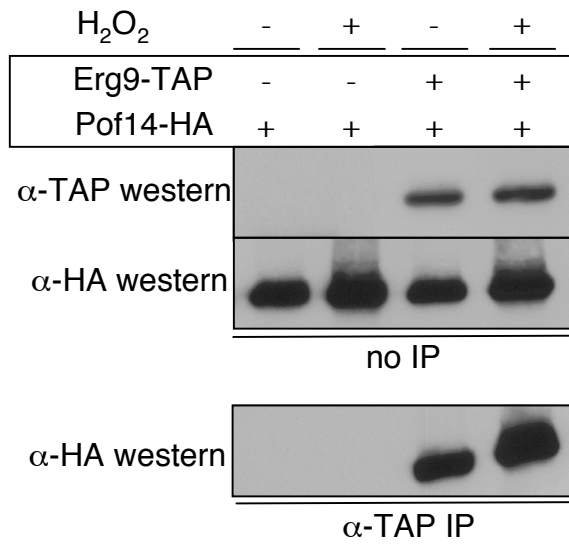

Co-immunoprecipitation of Erg9 and Pof14 in the absence or presence of 0,2mM H<sub>2</sub>O<sub>2</sub> (40 minutes). Protein extracts from cells expressing the indicated tagged proteins from the endogenous locus were prepared and used for immunoprecipitation using the indicated antibodies. After SDS-PAGE, immunoblotting was performed as indicated. Total extracts are shown as control.

## Supplementary Figure 1
