# Supplementary material
Source: PubMed Central journal article supplement (PMC1589992)
Supplement: 7601329s2.pdf [file 7601329s2.pdf]

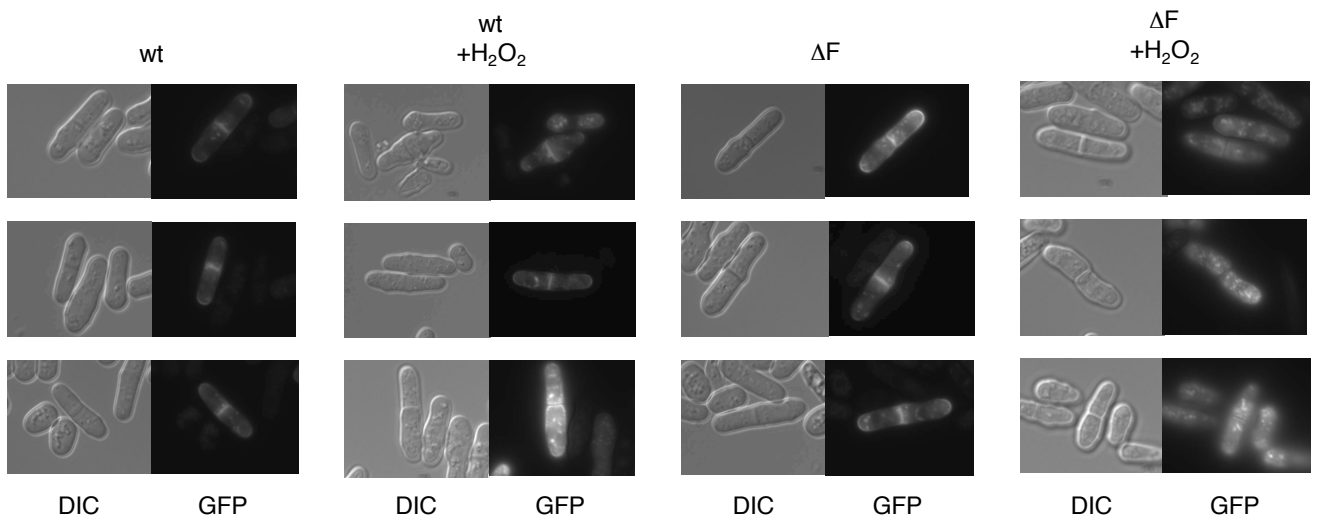

Indicated strains expressing the cell surface marker ScFus1-GFP from pREP41 were grown in the presence or absence of 0,2mM H<sub>2</sub>O<sub>2</sub> for 100 minutes and observed by fluorescence microscopy (GFP) or DIC.

## Supplementary Figure 2
