# Supplementary material
Source: PubMed Central journal article supplement (PMC1589992)
Supplement: 7601329s3.pdf [file 7601329s3.pdf]

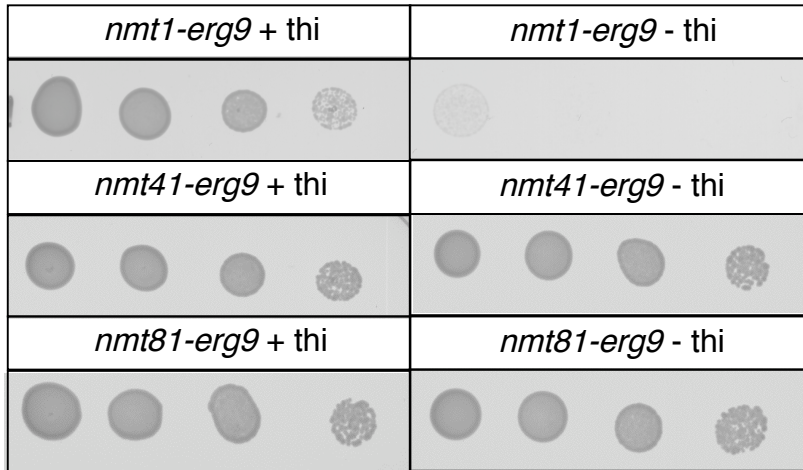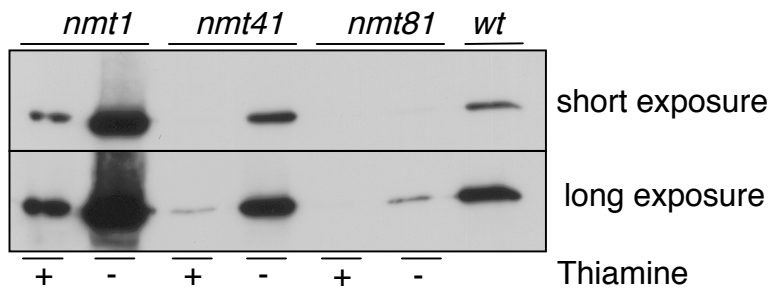

Upper panel: the *erg9* promoter was replaced with the weak (*nmt81*), middle (*nmt41*) or strong (*nmt1*) versions of the *nmt* promoter activated in the absence of thiamine. The strain was grown in medium containing thiamine and serial dilutions were spotted on medium supplemented or not with thiamine as indicated.

Lower panel: western blot analysis of the level of expression of Erg9 in the strains used above. Strains were grown for 16 hours in the presence or absence of thiamine and similar cell numbers were used to prepare total extracts. Wild type expression level of Erg9 is shown on the right.

### Supplementary Figure 3
