# Supplementary material
Source: PubMed Central journal article supplement (PMC1589992)
Supplement: 7601329s4.pdf [file 7601329s4.pdf]

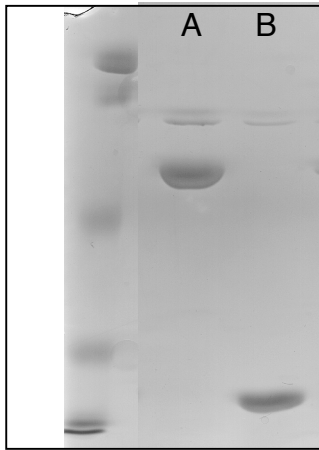

A: GST-Pof14  
B: GST-

Purified and concentrated GST- (27Kda) or GST-Pof14 (77Kda) were separated on SDS-PAGE and the gel was stained with Coomassie Blue

#### Supplementary Figure 4
